# Supplementary material for: Patient engagement in the development and delivery of healthcare services: a systematic scoping review
Source: HighWire-hosted journal article supplement (doi:10.1136/bmjoq-2023-002309), 2023-06-01
Supplement: bmjoq-2023-002309supp002_data_supplement.pdf [file bmjoq-2023-002309supp002_data_supplement.pdf]

Supplemental file 2 Quality appraisal of the included studies<sup>a,b</sup>

|                |                     | CASP - Qualitative Studies Checklist |    |    |    |    |    |    |    |    |         |
|----------------|---------------------|--------------------------------------|----|----|----|----|----|----|----|----|---------|
|                |                     | D1                                   | D2 | D3 | D4 | D5 | D6 | D7 | D8 | D9 | Overall |
| Primary study  | Amann, 2018         | +                                    | +  | +  | +  | +  | ✗  | +  | +  | +  | +       |
|                | Anderson, 2021      | +                                    | +  | +  | +  | +  | ✗  | +  | +  | +  | +       |
|                | Armstrong, 2017     | ✗                                    | +  | +  | +  | +  | ✗  | ✗  | +  | +  | ✗       |
|                | Carlsson, 2007      | +                                    | +  | +  | +  | +  | ✗  | +  | +  | +  | +       |
|                | de Souza, 2017      | +                                    | +  | +  | +  | ✗  | ✗  | ✗  | ✗  | ✗  | ✗       |
|                | Daouk-Oyry, 2018    | ✗                                    | +  | +  | +  | +  | ✗  | +  | ✗  | ✗  | ✗       |
|                | Dayekh, 2022        | +                                    | +  | +  | +  | +  | ✗  | +  | +  | +  | +       |
|                | Fudge, 2008         | +                                    | +  | +  | ✗  | +  | +  | +  | ✗  | +  | -       |
|                | Gagliardi, 2008     | +                                    | +  | +  | +  | ✗  | +  | +  | ✗  | +  | -       |
|                | Galvin, 2020        | +                                    | +  | +  | +  | +  | ✗  | +  | +  | +  | +       |
|                | Goodman, 2017       | +                                    | +  | +  | +  | +  | +  | ✗  | +  | +  | +       |
|                | Gurung, 2017        | +                                    | +  | +  | ✗  | +  | +  | +  | +  | +  | +       |
|                | Hashem, 2018        | +                                    | +  | +  | +  | +  | ✗  | +  | +  | +  | +       |
|                | Lindblom, 2021      | +                                    | +  | +  | +  | +  | ✗  | +  | +  | +  | +       |
|                | McKevitt, 2018      | +                                    | +  | +  | +  | +  | +  | +  | ✗  | +  | +       |
|                | Neech, 2018         | +                                    | +  | +  | +  | +  | +  | ✗  | +  | +  | +       |
|                | O'Donnell, 2019     | +                                    | ✗  | ✗  | ✗  | ✗  | ✗  | +  | ✗  | ✗  | ✗       |
|                | Rise, 2014          | +                                    | +  | +  | ✗  | +  | ✗  | +  | ✗  | +  | ✗       |
|                | Rise, 2013          | +                                    | +  | +  | +  | +  | ✗  | +  | +  | +  | +       |
|                | Samudre, 2016       | +                                    | +  | +  | +  | +  | ✗  | +  | +  | +  | +       |
|                | Sharma, 2018        | +                                    | +  | +  | +  | +  | ✗  | ✗  | ✗  | ✗  | ✗       |
|                | Steffensen, 2022    | +                                    | +  | +  | +  | +  | ✗  | ✗  | +  | +  | -       |
|                | van der Meide, 2015 | +                                    | +  | +  | +  | +  | +  | +  | +  | +  | +       |
| Weiste, 2021   | +                   | +                                    | +  | +  | +  | ✗  | +  | +  | ✗  | -  |         |
| Whiston, 2019  | ✗                   | +                                    | +  | ✗  | +  | +  | +  | +  | ✗  | ✗  |         |
| Woelders, 2019 | +                   | +                                    | +  | +  | ✗  | ✗  | ✗  | ✗  | ✗  | ✗  |         |

D1: Aim  
 D2: Method  
 D3: Design  
 D4: Recruitment  
 D5: Data collection  
 D6: Relationship researcher-participant  
 D7: Ethics  
 D8: Analysis rigour  
 D9: Clear findings

Judgement  
 ✗ Poor quality  
 - Fair quality  
 + Good quality

<sup>a</sup>The response categories C= Can't tell and N=No were collapsed to no, < two "no" = good quality, < three "no" = fair quality and ≤ three "no" = poor quality. <sup>b</sup>Robvis<sup>23</sup> was used to create visual quality assessment tables.

CASP - Randomised Controlled Trial Checklist

|                                  | D1 | D2 | D3 | D4 | D5 | D6 | D7 | D8 | D9 | Overall |
|----------------------------------|----|----|----|----|----|----|----|----|----|---------|
| Primary study<br>Armstrong, 2018 | +  | +  | +  | X  | X  | +  | +  | X  | +  | X       |
| Boivin, 2014                     | +  | +  | +  | X  | +  | +  | X  | +  | X  | X       |
| Dickinson, 20220                 | X  | +  | X  | X  | X  | X  | +  | +  | X  | X       |

D1: Aim  
D2: Random  
D3: All accounted for?  
D4: methods  
D5: Groups similar?  
D6: level of care?  
D7: Effects  
D8: Precision  
D9: Harms

Judgement  
 Poor quality  
 Good quality

<sup>a</sup>The response categories C= Can't tell and N=No were collapsed to no, < two "no" = good quality, < three "no" = fair quality and ≤ three "no" = poor quality. <sup>b</sup>Robvis<sup>23</sup> was used to create visual quality assessment tables.

Mixed Methods Appraisal Tool (MMAT), version 2018, category 5, Mixed methods

|                                 | D1 | D2 | D3 | D4 | D5 | D6 | D7 | Overall |
|---------------------------------|----|----|----|----|----|----|----|---------|
| Primary study<br>Brouwers, 2017 | +  | +  | +  | X  | X  | +  | +  | -       |
| Greene, 2018                    | +  | +  | X  | X  | X  | +  | +  | X       |
| Livingston, 2013                | +  | +  | +  | X  | X  | +  | +  | -       |
| Omeni, 2014                     | +  | +  | +  | X  | +  | +  | +  | +       |

D1: Aim  
D2: Data  
D3: Adequate rationale  
D4: Effectively integrated  
D5: Outputs  
D6: Divergences and inconsistencies  
D7: Do the different components of the study adhere to the quality criteria

Judgement  
 Poor quality  
 Fair quality  
 Good quality

<sup>a</sup>The response categories C= Can't tell and N=No were collapsed to no, < two "no" = good quality, < three "no" = fair quality and ≤ three "no" = poor quality. <sup>b</sup>Robvis<sup>23</sup> was used to create visual quality assessment tables.

Mixed Methods Appraisal Tool (MMAT), version 2018, category 4, Quantitative descriptive

|               | D1                               | D2 | D3 | D4 | D5 | D6 | D7 | Overall |   |
|---------------|----------------------------------|----|----|----|----|----|----|---------|---|
| Primary study | Fraenkel, 2016 (Case report)     | +  | +  | ×  | +  | +  | ×  | +       | - |
|               | Gremyr, 2018 (Cross-sectional)   | ×  | ×  | ×  | ×  | +  | +  | ×       | × |
|               | Scholtes, 2021 (Cross-sectional) | +  | +  | +  | ×  | +  | ×  | +       | - |
|               | Hwang, (Cross-sectional)         | +  | +  | +  | ×  | +  | ×  | +       | - |

D1: Aim  
 D2: Data  
 D3: Sampling strategy relevant  
 D4: Representative  
 D5: Appropriate measurements  
 D6: Low risk of nonresponse bias  
 D7: Appropriate statistical analysis

**Judgement**  
 × Poor quality  
 - Fair quality  
 + Good quality

<sup>a</sup>The response categories C= Can't tell and N=No were collapsed to no, < two "no" = good quality, < three "no" = fair quality and ≤ three "no" = poor quality. <sup>b</sup>Robvis<sup>23</sup> was used to create visual quality assessment tables.
